# Supplementary material for: Exploring Micromonospora as Phocoenamicins Producers
Source: MDPI journal article supplement (doi:10.3390/md20120769), 2022-12-07
Supplement: s1 [file s1]

# Exploring *Micromonospora* as Phocoenamicins Producers

Maria Kokkini\*, Cristina González Heredia, Daniel Oves-Costales, Mercedes de la Cruz, Jesús Martín, Francisca Vicente, Olga Genilloud and Fernando Reyes\*

Fundación MEDINA, Centro de Excelencia en Investigación de Medicamentos Innovadores en Andalucía. Parque Tecnológico Ciencias de la Salud. Avda. del Conocimiento 34, 18016 Armilla, Granada, Spain;

\* Correspondence: [maria.kokkini@medinaandalucia.es](mailto:maria.kokkini@medinaandalucia.es) (M.K.); [fernando.reyes@medinaandalucia.es](mailto:fernando.reyes@medinaandalucia.es) (F.R.) Tel.: +34-958-993-965 (F.R.)

## Contents

**Table S1.** Composition of the 10 culture media used in the OSMAC approach.

**Figure S1.** Total Ion Chromatogram (TIC) of the crude extract from the strain CA-214658 grown in RAM2-P V2 medium.

**Figure S2.** The ESI-TOF spectrum of phocoenamicin.

**Figure S3.** The ESI-TOF spectrum of phocoenamicin B.

**Figure S4.** The ESI-TOF spectrum of phocoenamicin C.

**Figure S5.** The boxplot and density plot showing the normalization result in MetaboAnalyst 5.0 after sample normalization, data transformation and scaling of the preprocessed LC-HRMS data obtained from the 270 extracts.

**Figure S6.** The boxplot and density plot showing the normalization result in MetaboAnalyst 5.0 after sample normalization, data transformation and scaling of the preprocessed LC-HRMS data obtained from the 27 extracts in RAM2-P V2 medium.

**Figure S7.** PLS-DA 2D Score plots of the 270 extracts for the parameters (a) different strains, (b) taxonomy species, (c) geographic origin and (d) ecology. All four models resulted in overfitting and lack of validation.

**Figure S8.** (a) Cross-validation test (CV) with values of  $R_2=0.859$  and  $Q_2=0.841$  and (b) permutation test with p-value  $< 0.01$  of the PLS-DA analysis of the 270 extracts grouped by culture medium that validated its significance.

**Figure S9.** The classical molecular network (GNPS) generated from the extracts of the 27 strains cultured in RAM2-P V2 medium. The nodes are coloured according to the geographic origin of the 27 strains.

**Table S2.** Average % inhibition of the 270 extracts against MRSA MB5393, *M. bovis* BCG and *M. tuberculosis* H37Ra.

**Table S1.** Composition of the 10 culture media used in the OSMAC approach.

| <b>Culture medium</b> | <b>Carbon source</b>                        | <b>Nitrogen source</b>              | <b>Trace elements and additional components</b>                                                                 |
|-----------------------|---------------------------------------------|-------------------------------------|-----------------------------------------------------------------------------------------------------------------|
| <b>APM9</b>           | Glucose (SIGMA G8270)                       | Soybean Flour (SIGMA S9633)         | CoCl <sub>2</sub> · 6H <sub>2</sub> O (SIGMA C8661)                                                             |
|                       | Soluble starch from potato (PANREAC 121096) | -                                   | CaCO <sub>3</sub> (ACROS ORGANICS 450680010)                                                                    |
| <b>DEF-15</b>         | Sucrose (FISHER S8600/70)                   | NH <sub>4</sub> Cl (PANREAC 141121) | Na <sub>2</sub> SO <sub>4</sub> (MERCK 1.06649)                                                                 |
|                       | -                                           | -                                   | K <sub>2</sub> HPO <sub>4</sub> (MERCK 5101)                                                                    |
|                       | -                                           | -                                   | MgCl <sub>2</sub> · 6H <sub>2</sub> O (MERCK 5833)                                                              |
|                       | -                                           | -                                   | NaCl (MERCK 1.06404)                                                                                            |
|                       | -                                           | -                                   | CaCO <sub>3</sub> (ACROS ORGANICS 450680010)                                                                    |
|                       | -                                           | -                                   | MnCl <sub>2</sub> · 4H <sub>2</sub> O;<br>ZnCl <sub>2</sub> ;<br>FeCl <sub>2</sub> · 4H <sub>2</sub> O;<br>NaCl |
| <b>DEF-15-S</b>       | Sucrose (FISHER S8600/70)                   | NH <sub>4</sub> Cl (PANREAC 141121) | Na <sub>2</sub> SO <sub>4</sub> (MERCK 1.06649)                                                                 |
|                       | Soluble starch from potato (PANREAC 121096) | -                                   | K <sub>2</sub> HPO <sub>4</sub> (MERCK 5101)                                                                    |
|                       | -                                           | -                                   | MgCl <sub>2</sub> · 6H <sub>2</sub> O (MERCK 5833)                                                              |
|                       | -                                           | -                                   | NaCl (MERCK 1.06404)                                                                                            |
|                       | -                                           | -                                   | CaCO <sub>3</sub> (ACROS ORGANICS 450680010)                                                                    |
|                       | -                                           | -                                   | MnCl <sub>2</sub> · 4H <sub>2</sub> O;<br>ZnCl <sub>2</sub> ;<br>FeCl <sub>2</sub> · 4H <sub>2</sub> O;<br>NaCl |
| <b>DNPM</b>           | Dextrin from corn Type I (SIGMA D2006)      | N-Z Soy BL (SIGMA P6713)            | MOPS (FISHER BP 308)                                                                                            |
|                       | -                                           | Bacto yeast extract (DIFCO 212750)  | -                                                                                                               |
| <b>FPY-12</b>         | Fructose (PANREAC 142728)                   | Bacto peptone (DIFCO 211677)        | FeSO <sub>4</sub> · 7H <sub>2</sub> O;<br>ZnSO <sub>4</sub> · 7H <sub>2</sub> O;                                |

|           |                                             |                                     |                                                                                                                                                            |
|-----------|---------------------------------------------|-------------------------------------|------------------------------------------------------------------------------------------------------------------------------------------------------------|
|           | Glucose (SIGMA G8270)                       | Amicase (SIGMA A2427)               | MnSO <sub>4</sub> · H <sub>2</sub> O;<br>CuSO <sub>4</sub> · 5H <sub>2</sub> O;<br>CoCl <sub>2</sub> · 6 H <sub>2</sub> O                                  |
|           | Maltose (MERCK 1.05910)                     | -                                   | -                                                                                                                                                          |
| FPY-2     | Fructose (PANREAC 142728)                   | Bacto peptone (DIFCO 211677)        | FeSO <sub>4</sub> · 7H <sub>2</sub> O;<br>ZnSO <sub>4</sub> · 7H <sub>2</sub> O;                                                                           |
|           | Sucrose (FISHER S8600/70)                   | Bacto yeast extract (DIFCO 212750)  | MnSO <sub>4</sub> · H <sub>2</sub> O;<br>CuSO <sub>4</sub> · 5H <sub>2</sub> O;<br>CoCl <sub>2</sub> · 6 H <sub>2</sub> O                                  |
|           | Maltose (MERCK 1.05910)                     | -                                   | -                                                                                                                                                          |
| FR23      | Glucose (SIGMA G8270)                       | Cottonseed flour (FLUKA C4898)      | -                                                                                                                                                          |
|           | Soluble starch from potato (PANREAC 121096) | -                                   | -                                                                                                                                                          |
|           | Cane molasses (Mercadona)                   | -                                   | -                                                                                                                                                          |
| M016      | Glucose (SIGMA G8270)                       | Bacto yeast extract (DIFCO 212750)  | KH <sub>2</sub> PO <sub>4</sub> (MERCK 1.04871)                                                                                                            |
|           | Soluble starch from potato (PANREAC 121096) | Bacto soytone (DIFCO 243620)        | K <sub>2</sub> HPO <sub>4</sub> (MERCK 5101)                                                                                                               |
|           | Maltose (MERCK 1.05910)                     | Bacto tryptone (DIFCO 211705)       | MgSO <sub>4</sub> · 7H <sub>2</sub> O (MERCK 5886)                                                                                                         |
|           | -                                           | -                                   | NaCl (MERCK 1.06404)                                                                                                                                       |
|           | -                                           | -                                   | CaCl <sub>2</sub> · 2H <sub>2</sub> O (MERCK 1.02382)                                                                                                      |
|           | -                                           | -                                   | SnCl <sub>2</sub> · 2H <sub>2</sub> O;<br>H <sub>3</sub> BO <sub>3</sub> ;<br>Na <sub>2</sub> MoO <sub>4</sub> · 2H <sub>2</sub> O;<br>CuSO <sub>4</sub> ; |
|           | -                                           | -                                   | CoCl <sub>2</sub> · 6H <sub>2</sub> O; KCl;<br>ZnCl <sub>2</sub> ; MnSO <sub>4</sub> · 4H <sub>2</sub> O; FeCl <sub>3</sub> ; HCl                          |
| RAM2-P V2 | Glucose (SIGMA G8270)                       | Corn meal yellow (SIGMA C6304)      | -                                                                                                                                                          |
|           | Maltose (MERCK 1.05910)                     | Bacto yeast extract (DIFCO 212750)  | -                                                                                                                                                          |
|           | -                                           | Proteose peptone (SIGMA P0431)      | -                                                                                                                                                          |
| SAM-6     | Glucose (SIGMA G8270)                       | Bacto yeast extract (DIFCO 212750)  | CoCl <sub>2</sub> · 6H <sub>2</sub> O (SIGMA C8661)                                                                                                        |
|           | Soluble starch from potato (PANREAC 121096) | NZ Amine type E (EKC) (SIGMA N4767) | CaCO <sub>3</sub> (ACROS ORGANICS 450680010)                                                                                                               |

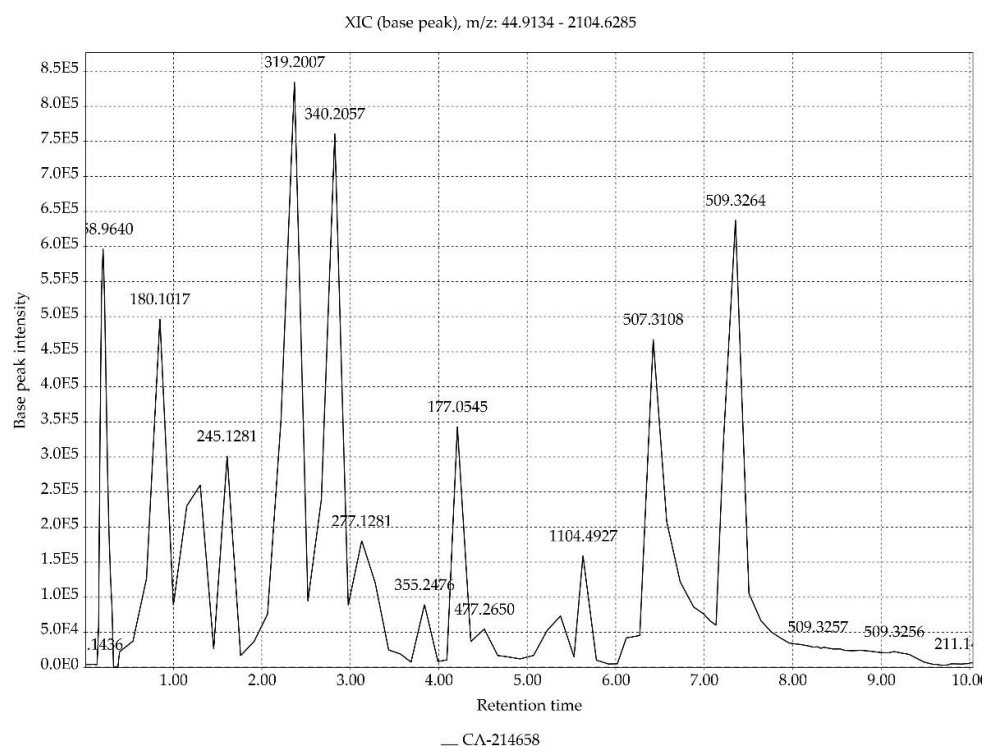

**Figure S1.** Total Ion Chromatogram (TIC) of the crude extract from the strain CA-214658 grown in RAM2-P V2 medium.

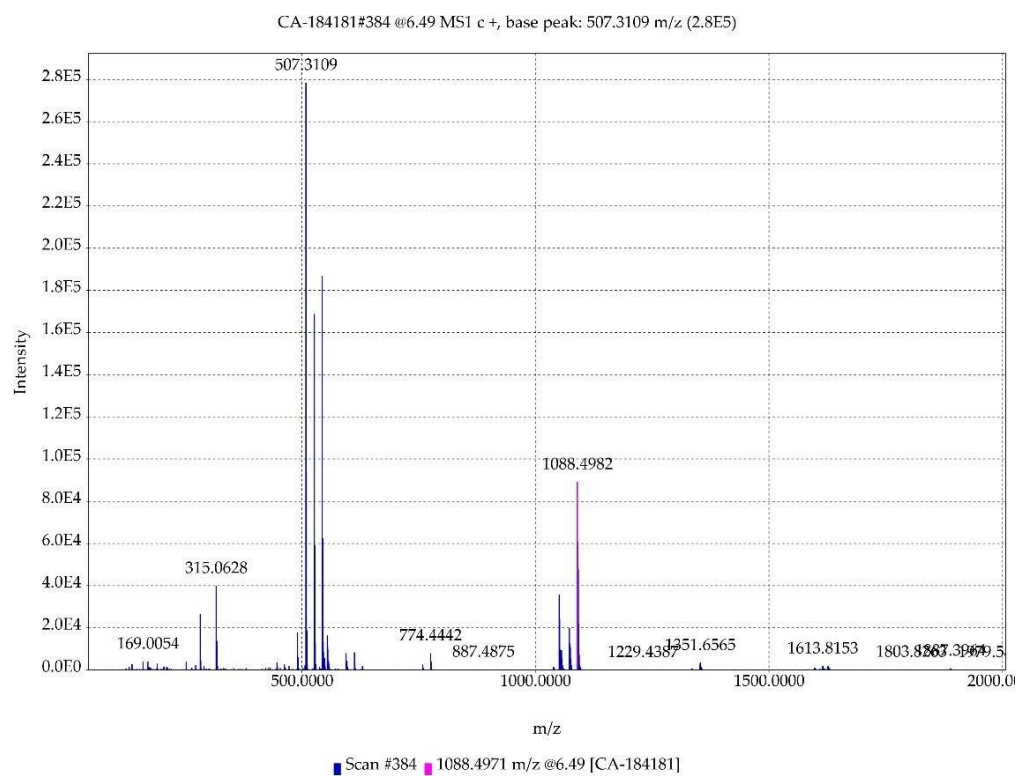

**Figure S2.** The ESI-TOF spectrum of phicoenamicin.

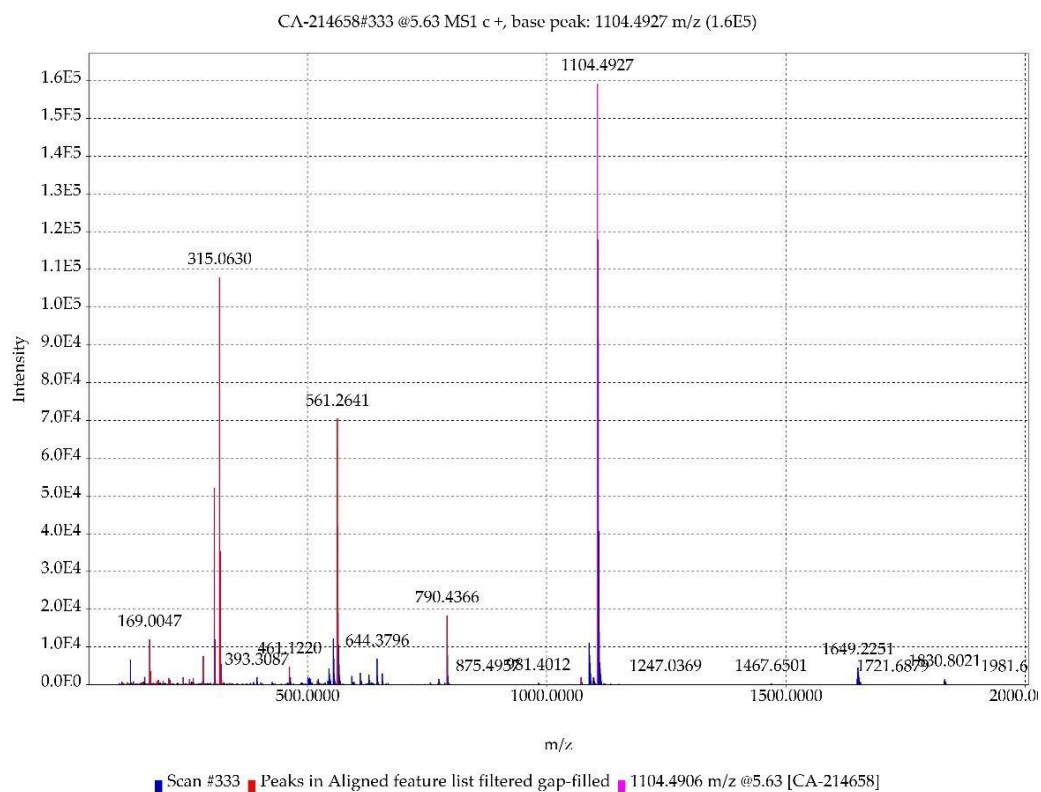

**Figure S3.** The ESI-TOF spectrum of phocoenamicin B.

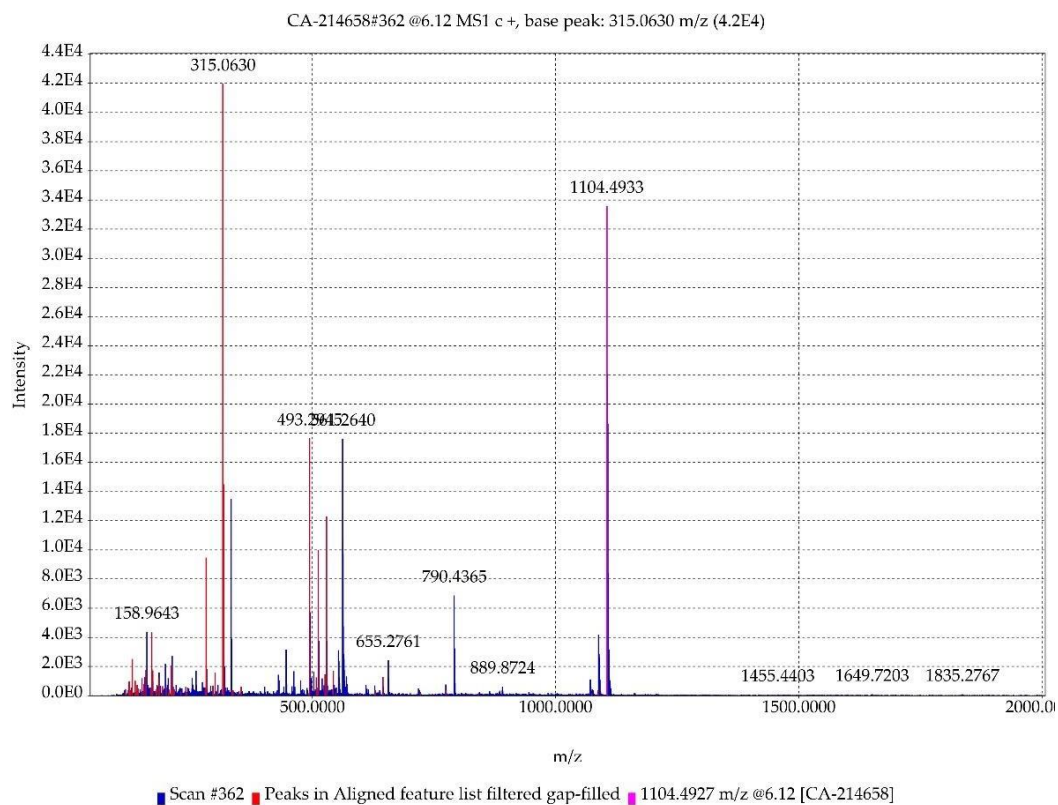

**Figure S4.** The ESI-TOF spectrum of phocoenamicin C.

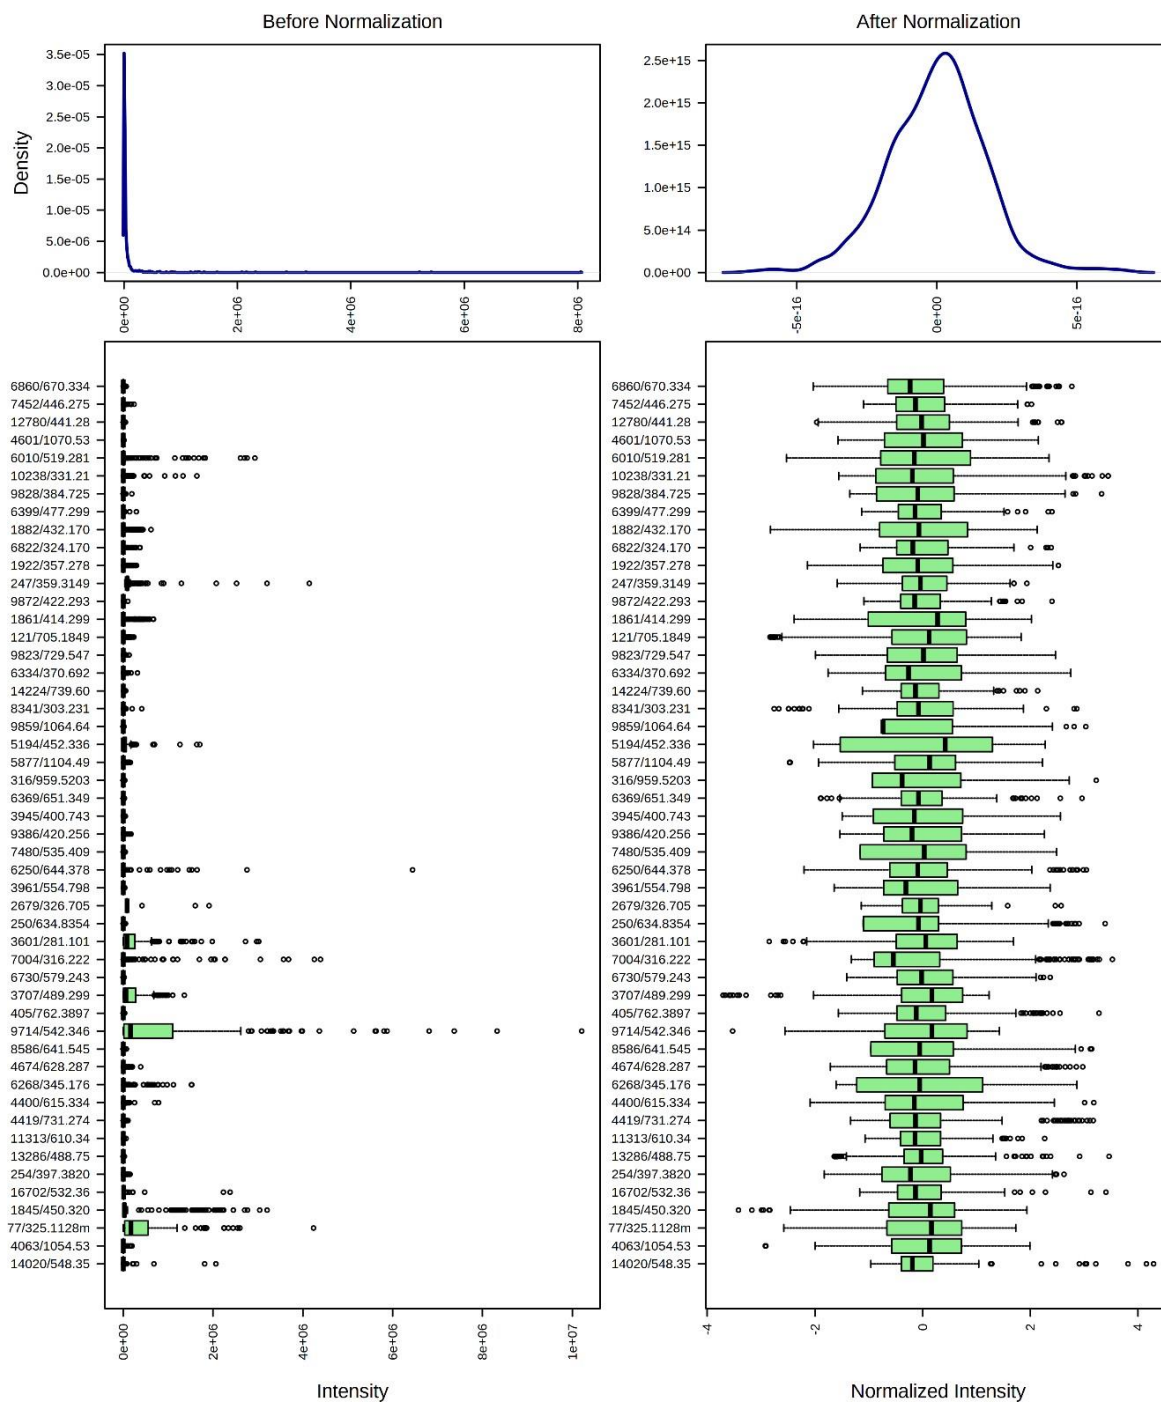

**Figure S5.** The boxplot and density plot showing the normalization result in MetaboAnalyst 5.0 after sample normalization, data transformation and scaling of the preprocessed LC-HRMS data obtained from the 270 extracts.



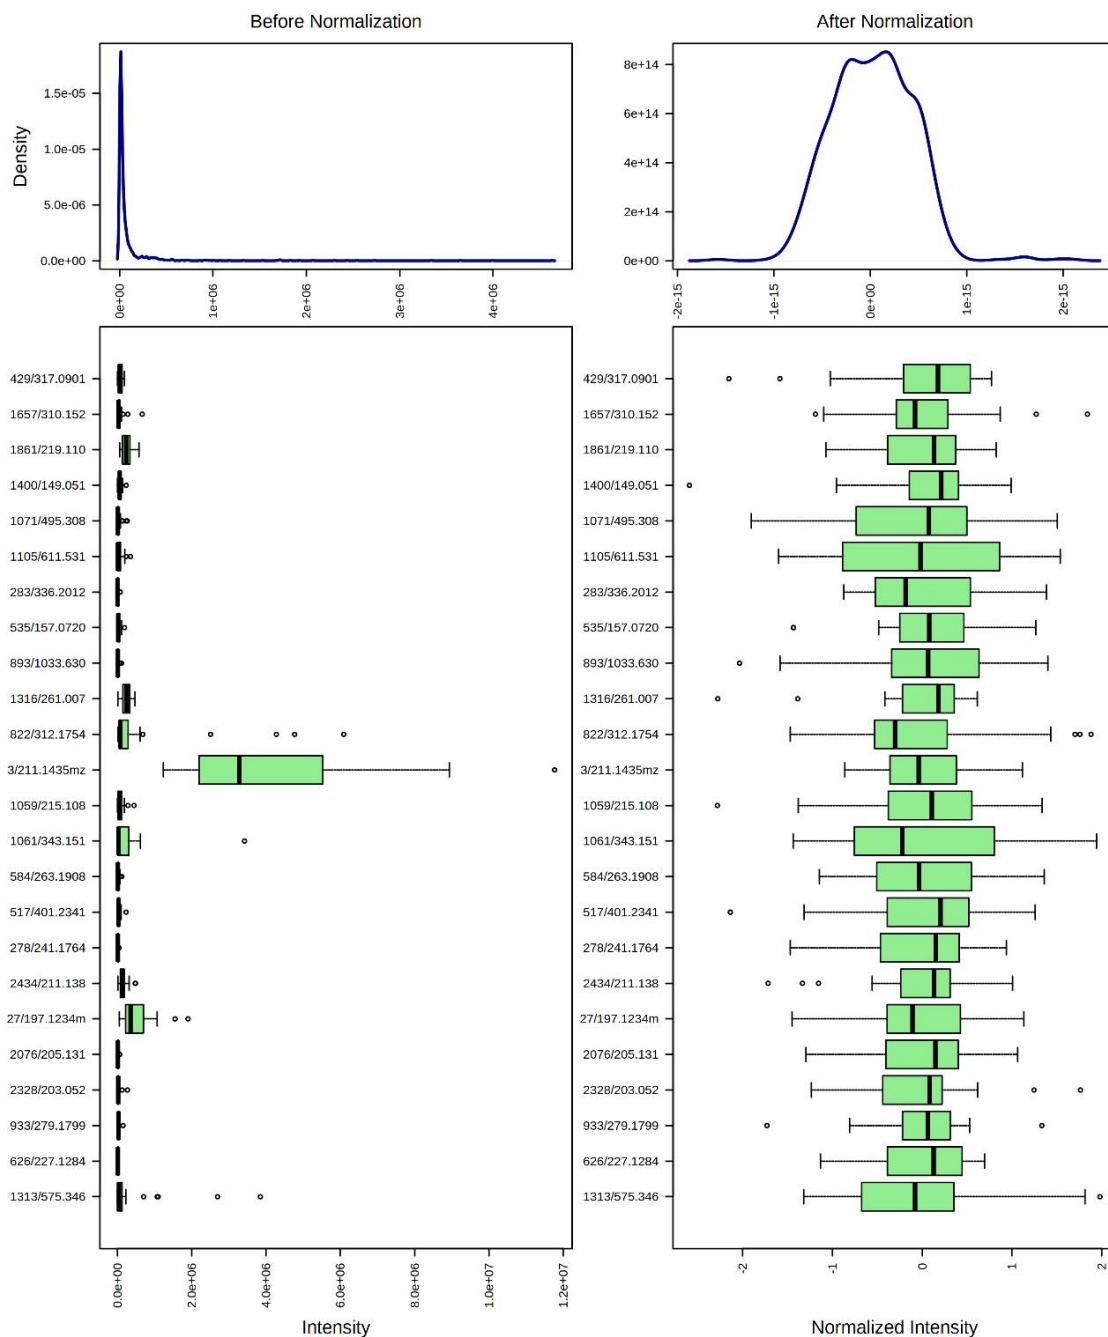

**Figure S6.** The boxplot and density plot showing the normalization result in MetaboAnalyst 5.0 after sample normalization, data transformation and scaling of the preprocessed LC-HRMS data obtained from the 27 extracts in RAM2-P V2 medium.

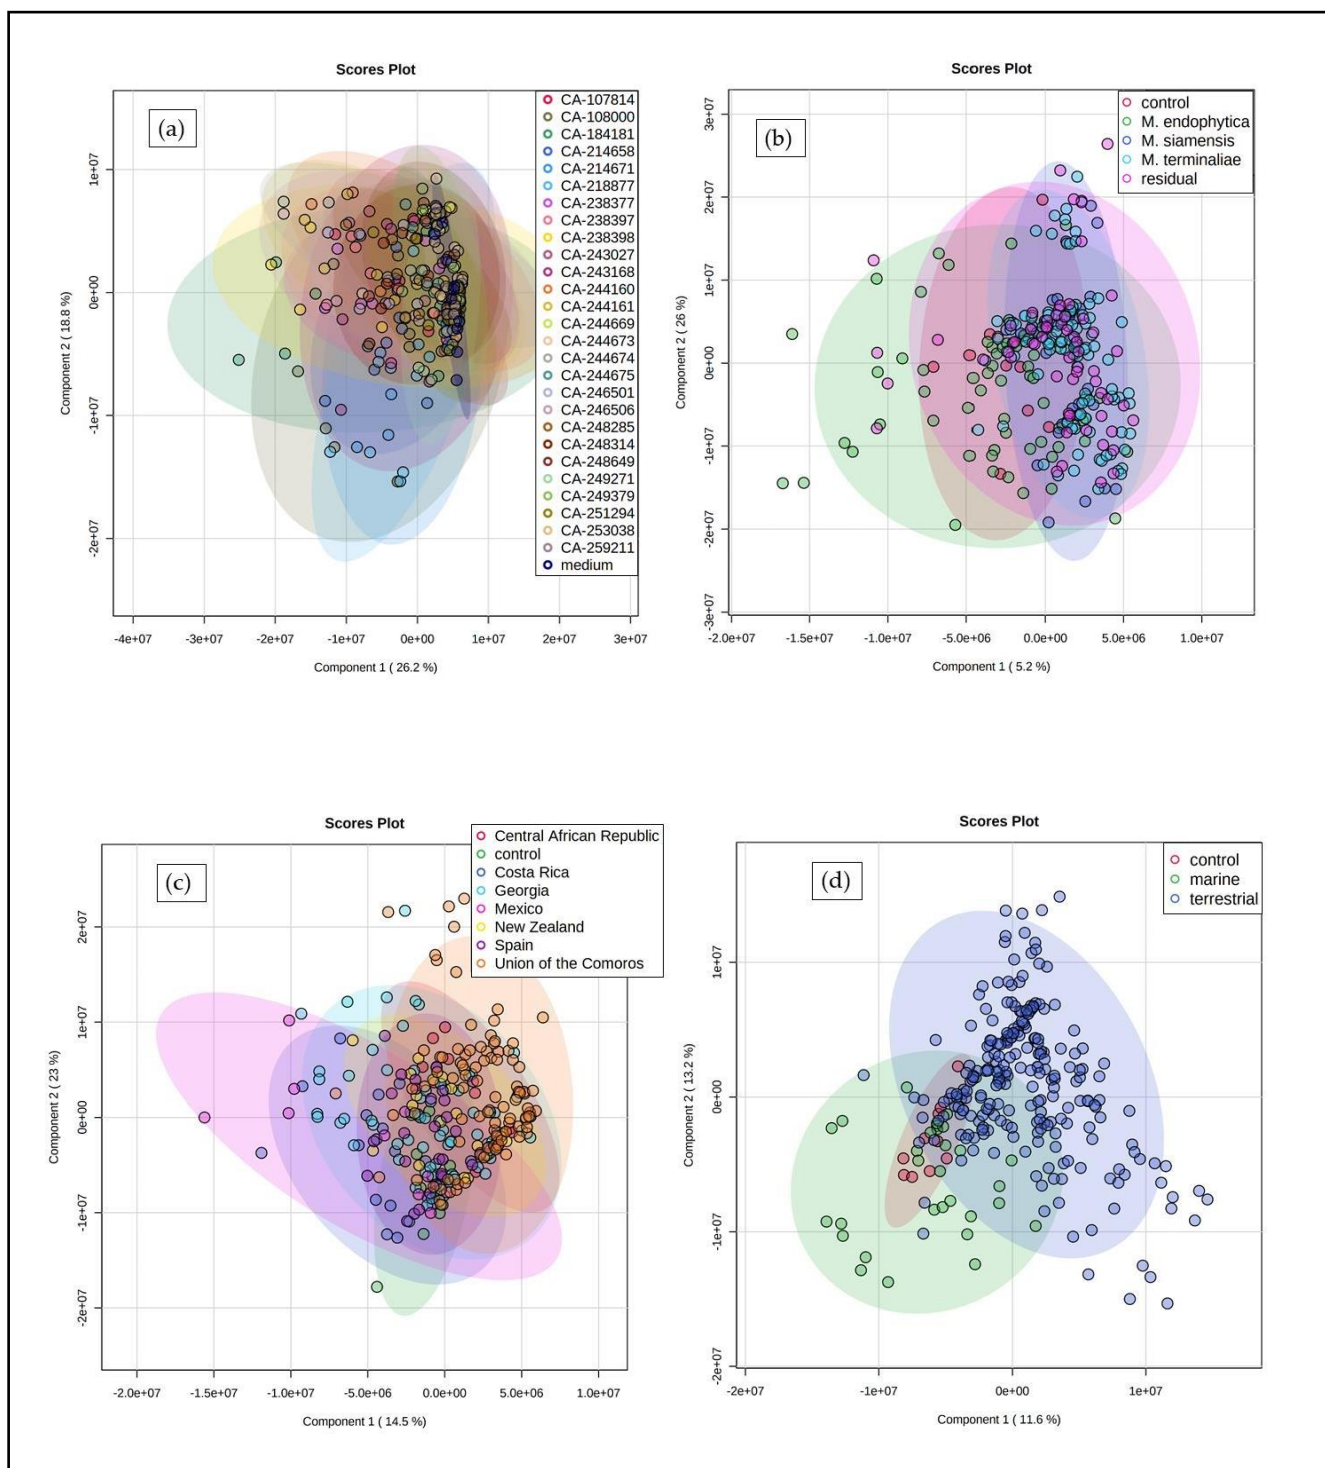

**Figure S7.** PLS-DA 2D Score plots of the 270 extracts for the parameters (a) different strains, (b) taxonomy species, (c) geographic origin and (d) ecology. All four models resulted in overfitting and lack of validation.



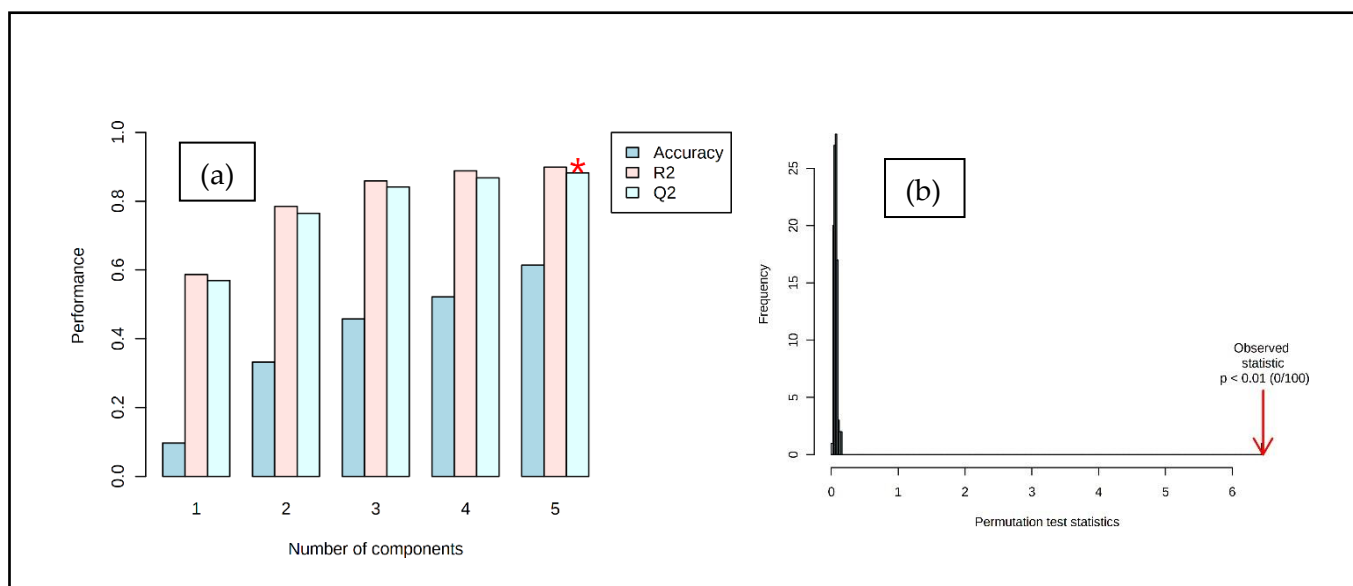

**Figure S8.** (a) Cross-validation test (CV) with values of  $R_2=0.859$  and  $Q_2=0.841$  and (b) permutation test with p-value < 0.01 of the PLS-DA analysis of the 270 extracts grouped by culture medium that validated its significance.

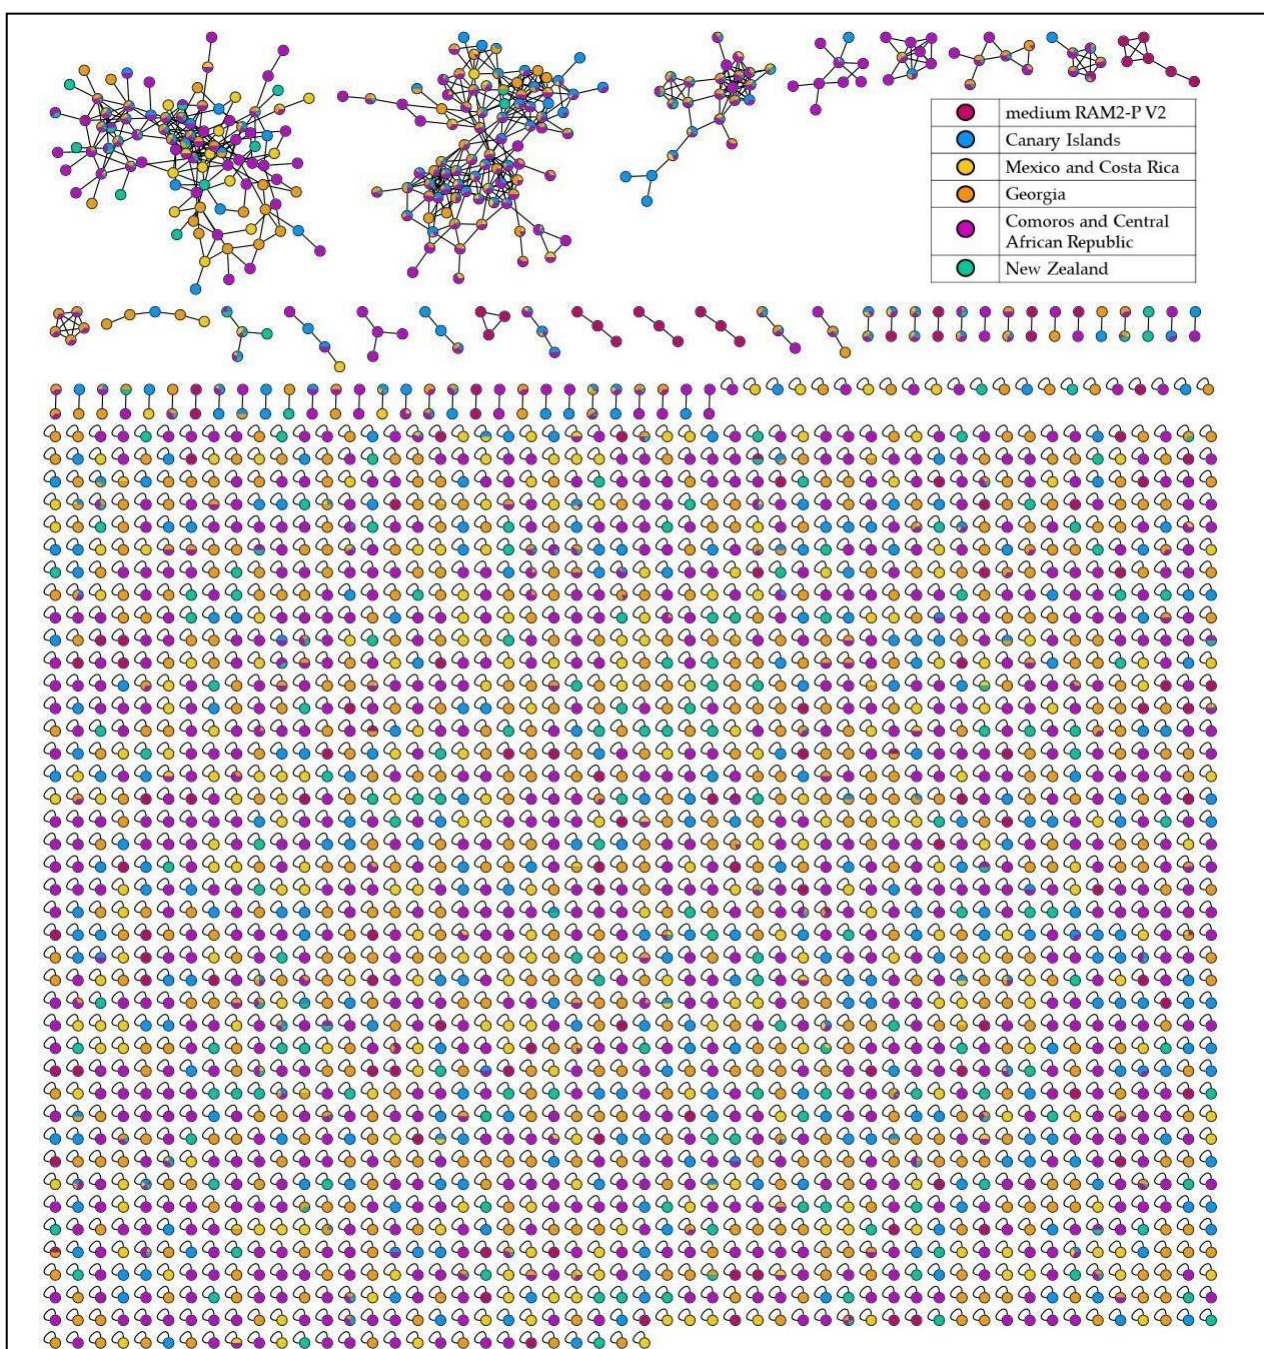

**Figure S9.** The classical molecular network (GNPS) generated from the extracts of the 27 strains cultured in RAM2-P V2 medium. The nodes are coloured according to the geographic origin of the 27 strains.

**Table S2.** Average % inhibition of the 270 extracts against MRSA MB5393, *M. bovis* BCG and *M. tuberculosis* H37Ra.

| STRAIN    | CULTURE MEDIUM | Average % Inhibition |                              |                     |
|-----------|----------------|----------------------|------------------------------|---------------------|
|           |                | MRSA MB5393          | <i>M. tuberculosis</i> H37Ra | <i>M. bovis</i> BCG |
| CA-107814 | APM9           | -47,2                | -89,7                        | -88,5               |
| CA-107814 | DEF-15         | 36,6                 | -38,9                        | -7,9                |
| CA-107814 | DEF-15S        | 25,8                 | -50,7                        | -10,2               |
| CA-107814 | DNPM           | 5,5                  | -96,8                        | -93,9               |
| CA-107814 | FPY-12         | 4,1                  | -86,9                        | -78,9               |
| CA-107814 | FPY-2          | -99,1                | -90,5                        | -89,1               |
| CA-107814 | FR23           | -51,8                | -93,8                        | -91,7               |
| CA-107814 | M016           | -5,5                 | -90,5                        | -89,7               |
| CA-107814 | RAM2-P V2      | -94,7                | -92,1                        | -92,2               |
| CA-107814 | SAM-6          | -4,5                 | -95,8                        | -93,5               |
| CA-108000 | APM9           | -99,8                | -90,0                        | -88,3               |
| CA-108000 | DEF-15         | 37,5                 | -75,6                        | -9,9                |
| CA-108000 | DEF-15S        | 28,2                 | -91,8                        | -11,7               |
| CA-108000 | DNPM           | 20,4                 | -97,0                        | -94,1               |
| CA-108000 | FPY-12         | -97,0                | -88,1                        | -88,1               |
| CA-108000 | FPY-2          | -99,4                | -90,6                        | -88,7               |
| CA-108000 | FR23           | -38,1                | -93,4                        | -90,7               |
| CA-108000 | M016           | -99,5                | -93,2                        | -91,8               |
| CA-108000 | RAM2-P V2      | -90,4                | -96,8                        | -94,5               |
| CA-108000 | SAM-6          | -63,5                | -95,2                        | -93,1               |
| CA-184181 | APM9           | -94,7                | -94,1                        | -92,2               |
| CA-184181 | DEF-15         | 23,8                 | -95,6                        | -9,8                |
| CA-184181 | DEF-15S        | 4,2                  | -60,6                        | -90,1               |
| CA-184181 | DNPM           | 25,1                 | -96,9                        | -91,4               |
| CA-184181 | FPY-12         | -79,6                | -87,7                        | -87,6               |
| CA-184181 | FPY-2          | -101,7               | -93,4                        | -91,6               |
| CA-184181 | FR23           | -98,9                | -96,9                        | -94,0               |
| CA-184181 | M016           | -98,7                | -97,3                        | -94,5               |
| CA-184181 | RAM2-P V2      | -72,2                | -97,1                        | -94,7               |
| CA-184181 | SAM-6          | -100,9               | -96,0                        | -93,2               |
| CA-214658 | APM9           | -75,7                | -91,7                        | -89,8               |
| CA-214658 | DEF-15         | 40,3                 | -35,5                        | -7,3                |
| CA-214658 | DEF-15S        | 27,2                 | -90,0                        | -23,4               |
| CA-214658 | DNPM           | 25,1                 | -96,5                        | -92,5               |
| CA-214658 | FPY-12         | -36,3                | -89,3                        | -88,3               |
| CA-214658 | FPY-2          | -100,0               | -93,0                        | -90,7               |
| CA-214658 | FR23           | -65,7                | -95,5                        | -91,7               |
| CA-214658 | M016           | -101,9               | -92,9                        | -91,5               |
| CA-214658 | RAM2-P V2      | -67,6                | -94,4                        | -92,5               |
| CA-214658 | SAM-6          | 5,9                  | -95,0                        | -90,5               |
| CA-214671 | APM9           | -101,0               | -89,4                        | -88,0               |



|           |           |        |       |       |
|-----------|-----------|--------|-------|-------|
| CA-214671 | DEF-15    | 37,3   | -62,5 | -6,7  |
| CA-214671 | DEF-15S   | 26,5   | -94,6 | -50,9 |
| CA-214671 | DNPM      | -16,0  | -97,1 | -93,5 |
| CA-214671 | FPY-12    | -92,4  | -92,2 | -90,1 |
| CA-214671 | FPY-2     | -92,3  | -93,8 | -91,7 |
| CA-214671 | FR23      | 16,8   | -93,4 | -28,7 |
| CA-214671 | M016      | -90,0  | -92,3 | -89,6 |
| CA-214671 | RAM2-P V2 | -68,8  | -94,6 | -91,9 |
| CA-214671 | SAM-6     | -21,4  | -57,9 | -92,0 |
| CA-218877 | APM9      | -97,0  | -90,7 | -86,5 |
| CA-218877 | DEF-15    | 39,2   | -96,5 | -11,5 |
| CA-218877 | DEF-15S   | 28,0   | -88,9 | -23,8 |
| CA-218877 | DNPM      | -46,6  | -96,5 | -93,6 |
| CA-218877 | FPY-12    | 12,1   | -88,3 | -60,5 |
| CA-218877 | FPY-2     | -86,7  | -92,8 | -90,7 |
| CA-218877 | FR23      | 9,8    | -77,5 | -84,8 |
| CA-218877 | M016      | -101,5 | -65,8 | -15,1 |
| CA-218877 | RAM2-P V2 | -77,3  | -96,1 | -93,0 |
| CA-218877 | SAM-6     | 15,8   | -97,0 | -93,0 |
| CA-238377 | APM9      | -92,5  | -92,9 | -90,6 |
| CA-238377 | DEF-15    | 37,8   | -26,7 | -5,6  |
| CA-238377 | DEF-15S   | 5,8    | -61,6 | -32,1 |
| CA-238377 | DNPM      | -98,0  | -66,0 | -94,1 |
| CA-238377 | FPY-12    | -100,5 | -89,6 | -88,1 |
| CA-238377 | FPY-2     | -94,0  | -91,8 | -88,6 |
| CA-238377 | FR23      | -97,4  | -31,4 | -94,2 |
| CA-238377 | M016      | -99,9  | -97,0 | -94,7 |
| CA-238377 | RAM2-P V2 | -91,2  | -96,5 | -92,9 |
| CA-238377 | SAM-6     | -99,7  | -28,7 | -72,2 |
| CA-238397 | APM9      | -99,7  | -91,8 | -90,4 |
| CA-238397 | DEF-15    | 40,4   | -69,5 | -6,3  |
| CA-238397 | DEF-15S   | 23,2   | -11,7 | -7,0  |
| CA-238397 | DNPM      | 28,9   | -94,4 | -15,9 |
| CA-238397 | FPY-12    | 31,3   | -6,0  | -18,5 |
| CA-238397 | FPY-2     | -98,8  | -89,2 | -88,7 |
| CA-238397 | FR23      | -149,1 | -34,0 | -58,2 |
| CA-238397 | M016      | -96,0  | -72,0 | -92,7 |
| CA-238397 | RAM2-P V2 | -95,5  | -92,9 | -90,0 |
| CA-238397 | SAM-6     | -100,2 | -2,3  | -60,8 |
| CA-238398 | APM9      | -38,4  | -92,4 | -86,7 |
| CA-238398 | DEF-15    | 39,9   | -7,5  | -5,0  |
| CA-238398 | DEF-15S   | 27,0   | -4,6  | -5,0  |
| CA-238398 | DNPM      | -3,1   | -97,2 | -41,5 |
| CA-238398 | FPY-12    | -44,9  | -10,0 | -13,4 |
| CA-238398 | FPY-2     | -55,0  | -94,6 | -52,7 |
| CA-238398 | FR23      | -62,1  | -95,2 | -91,8 |
| CA-238398 | M016      | -99,8  | -93,5 | -89,9 |

|           |           |        |       |       |
|-----------|-----------|--------|-------|-------|
| CA-238398 | RAM2-P V2 | 0,1    | -95,6 | -68,3 |
| CA-238398 | SAM-6     | -101,1 | -95,8 | -92,6 |
| CA-243027 | APM9      | -88,9  | -92,8 | -89,7 |
| CA-243027 | DEF-15    | 38,7   | -90,1 | -10,1 |
| CA-243027 | DEF-15S   | 28,3   | -11,1 | -10,8 |
| CA-243027 | DNPM      | 33,7   | -96,3 | -93,2 |
| CA-243027 | FPY-12    | 28,3   | -6,1  | -9,4  |
| CA-243027 | FPY-2     | -49,4  | -90,4 | -88,3 |
| CA-243027 | FR23      | -97,1  | -92,1 | -93,8 |
| CA-243027 | M016      | -79,7  | -97,1 | -94,8 |
| CA-243027 | RAM2-P V2 | -62,6  | -93,6 | -89,3 |
| CA-243027 | SAM-6     | -64,4  | -95,4 | -92,4 |
| CA-243168 | APM9      | -79,9  | -87,2 | -89,8 |
| CA-243168 | DEF-15    | 41,6   | -35,3 | -7,2  |
| CA-243168 | DEF-15S   | 30,1   | -97,6 | -14,6 |
| CA-243168 | DNPM      | 14,5   | -96,3 | -86,1 |
| CA-243168 | FPY-12    | -99,9  | -87,7 | -87,2 |
| CA-243168 | FPY-2     | -89,7  | -91,4 | -89,1 |
| CA-243168 | FR23      | 38,8   | -94,5 | -39,4 |
| CA-243168 | M016      | -97,1  | -94,7 | -92,4 |
| CA-243168 | RAM2-P V2 | -100,4 | -95,5 | -91,9 |
| CA-243168 | SAM-6     | -59,4  | -96,2 | -92,5 |
| CA-244160 | APM9      | -95,7  | -90,5 | -88,5 |
| CA-244160 | DEF-15    | 40,2   | 4,3   | -2,2  |
| CA-244160 | DEF-15S   | 4,8    | -94,8 | -84,7 |
| CA-244160 | DNPM      | 29,1   | -98,7 | -92,1 |
| CA-244160 | FPY-12    | -115,7 | -89,1 | -86,5 |
| CA-244160 | FPY-2     | -35,3  | -91,9 | -90,1 |
| CA-244160 | FR23      | -54,8  | -96,4 | -92,5 |
| CA-244160 | M016      | -100,2 | -95,7 | -94,0 |
| CA-244160 | RAM2-P V2 | -53,9  | -95,2 | -92,4 |
| CA-244160 | SAM-6     | -102,4 | -93,6 | -91,8 |
| CA-244161 | APM9      | -87,9  | -89,9 | -89,1 |
| CA-244161 | DEF-15    | 37,5   | -97,7 | -22,6 |
| CA-244161 | DEF-15S   | 5,2    | -97,9 | -21,4 |
| CA-244161 | DNPM      | 18,1   | -98,8 | -92,4 |
| CA-244161 | FPY-12    | -94,6  | -89,4 | -88,2 |
| CA-244161 | FPY-2     | -95,2  | -90,3 | -89,7 |
| CA-244161 | FR23      | -18,7  | -96,9 | -95,4 |
| CA-244161 | M016      | -99,8  | -94,9 | -91,8 |
| CA-244161 | RAM2-P V2 | -98,6  | -96,3 | -92,9 |
| CA-244161 | SAM-6     | -100,4 | -95,0 | -92,3 |
| CA-244669 | APM9      | -9,7   | -90,5 | -73,1 |
| CA-244669 | DEF-15    | -7,1   | -10,2 | -4,6  |
| CA-244669 | DEF-15S   | -23,1  | -6,4  | -5,2  |
| CA-244669 | DNPM      | 20,6   | 4,9   | -10,3 |
| CA-244669 | FPY-12    | -48,1  | -88,3 | -15,8 |



|           |           |        |       |       |
|-----------|-----------|--------|-------|-------|
| CA-244669 | FPY-2     | 31,9   | -62,7 | -6,3  |
| CA-244669 | FR23      | -99,4  | -95,7 | -91,1 |
| CA-244669 | M016      | -99,9  | -94,9 | -90,6 |
| CA-244669 | RAM2-P V2 | 6,4    | -78,4 | -14,1 |
| CA-244669 | SAM-6     | -99,5  | -74,3 | -92,7 |
| CA-244673 | APM9      | -82,0  | -94,0 | -91,0 |
| CA-244673 | DEF-15    | 29,5   | -98,8 | -55,8 |
| CA-244673 | DEF-15S   | 24,1   | -82,8 | -69,4 |
| CA-244673 | DNPM      | 24,4   | -17,4 | -8,9  |
| CA-244673 | FPY-12    | -82,8  | -88,0 | -86,5 |
| CA-244673 | FPY-2     | 24,2   | -91,5 | -88,4 |
| CA-244673 | FR23      | -94,5  | -96,2 | -92,0 |
| CA-244673 | M016      | -157,3 | -33,7 | -57,6 |
| CA-244673 | RAM2-P V2 | 34,8   | -93,5 | -86,7 |
| CA-244673 | SAM-6     | -99,4  | -94,9 | -90,4 |
| CA-244674 | APM9      | -90,4  | -91,1 | -89,7 |
| CA-244674 | DEF-15    | 36,6   | 2,5   | -0,4  |
| CA-244674 | DEF-15S   | 10,7   | -97,4 | -65,7 |
| CA-244674 | DNPM      | 15,7   | -97,5 | -13,8 |
| CA-244674 | FPY-12    | -90,6  | -89,6 | -87,9 |
| CA-244674 | FPY-2     | 37,9   | -61,7 | -9,1  |
| CA-244674 | FR23      | -86,6  | -42,6 | -83,4 |
| CA-244674 | M016      | -87,0  | -84,6 | -96,0 |
| CA-244674 | RAM2-P V2 | -99,0  | -95,7 | -93,3 |
| CA-244674 | SAM-6     | -85,0  | -94,3 | -90,3 |
| CA-244675 | APM9      | -90,0  | -90,4 | -88,0 |
| CA-244675 | DEF-15    | 22,3   | -96,7 | -4,7  |
| CA-244675 | DEF-15S   | -3,8   | -98,0 | -62,1 |
| CA-244675 | DNPM      | -98,6  | -92,2 | -93,9 |
| CA-244675 | FPY-12    | -98,0  | -88,7 | -87,7 |
| CA-244675 | FPY-2     | -81,5  | -92,2 | -90,5 |
| CA-244675 | FR23      | -126,8 | -81,8 | -92,7 |
| CA-244675 | M016      | -99,5  | -96,0 | -91,9 |
| CA-244675 | RAM2-P V2 | -99,3  | -94,4 | -90,8 |
| CA-244675 | SAM-6     | -98,9  | -95,4 | -84,8 |
| CA-246501 | APM9      | -91,9  | -94,1 | -91,1 |
| CA-246501 | DEF-15    | 42,0   | -0,7  | -2,6  |
| CA-246501 | DEF-15S   | 8,6    | -62,3 | -81,3 |
| CA-246501 | DNPM      | -41,9  | -98,0 | -93,8 |
| CA-246501 | FPY-12    | -139,0 | -89,4 | -88,4 |
| CA-246501 | FPY-2     | -91,5  | -91,5 | -88,5 |
| CA-246501 | FR23      | -95,6  | -97,1 | -76,1 |
| CA-246501 | M016      | -98,6  | -96,4 | -91,6 |
| CA-246501 | RAM2-P V2 | -103,9 | -95,2 | -92,4 |
| CA-246501 | SAM-6     | -100,3 | -96,4 | -92,9 |
| CA-246506 | APM9      | -99,5  | -94,8 | -92,0 |
| CA-246506 | DEF-15    | 18,6   | -96,3 | -8,6  |

|           |           |        |       |       |
|-----------|-----------|--------|-------|-------|
| CA-246506 | DEF-15S   | 7,1    | -96,8 | -73,5 |
| CA-246506 | DNPM      | -1,3   | -95,0 | -25,9 |
| CA-246506 | FPY-12    | -57,3  | -90,0 | -82,0 |
| CA-246506 | FPY-2     | -85,8  | -92,8 | -89,8 |
| CA-246506 | FR23      | -98,1  | -96,9 | -93,0 |
| CA-246506 | M016      | -99,3  | -96,4 | -93,7 |
| CA-246506 | RAM2-P V2 | -88,7  | -96,8 | -93,8 |
| CA-246506 | SAM-6     | -103,3 | -95,8 | -92,9 |
| CA-248285 | APM9      | 37,1   | -93,1 | -82,0 |
| CA-248285 | DEF-15    | 39,1   | -97,0 | -37,3 |
| CA-248285 | DEF-15S   | 18,5   | -95,5 | -5,5  |
| CA-248285 | DNPM      | 5,9    | -97,7 | -92,9 |
| CA-248285 | FPY-12    | -74,5  | -87,0 | -86,3 |
| CA-248285 | FPY-2     | -99,5  | -88,2 | -87,1 |
| CA-248285 | FR23      | -108,3 | -45,9 | -47,4 |
| CA-248285 | M016      | -98,2  | -99,3 | -96,0 |
| CA-248285 | RAM2-P V2 | -98,5  | -94,3 | -91,1 |
| CA-248285 | SAM-6     | -132,8 | -93,6 | -91,1 |
| CA-248314 | APM9      | -94,6  | -90,6 | -86,7 |
| CA-248314 | DEF-15    | 43,6   | -94,2 | -11,5 |
| CA-248314 | DEF-15S   | 33,6   | -93,9 | -20,6 |
| CA-248314 | DNPM      | 44,7   | -97,3 | -92,5 |
| CA-248314 | FPY-12    | -45,1  | -87,8 | -77,1 |
| CA-248314 | FPY-2     | -97,3  | -89,0 | -88,6 |
| CA-248314 | FR23      | -86,5  | -93,9 | -90,7 |
| CA-248314 | M016      | -116,9 | -93,0 | -90,3 |
| CA-248314 | RAM2-P V2 | -85,5  | -93,4 | -91,1 |
| CA-248314 | SAM-6     | -12,3  | -94,7 | -92,5 |
| CA-248649 | APM9      | -95,8  | -87,5 | -63,7 |
| CA-248649 | DEF-15    | 24,6   | -46,2 | -3,3  |
| CA-248649 | DEF-15S   | 4,2    | -98,7 | -25,0 |
| CA-248649 | DNPM      | 24,7   | -98,2 | -13,9 |
| CA-248649 | FPY-12    | -98,8  | -89,4 | -86,5 |
| CA-248649 | FPY-2     | -81,3  | -90,2 | -87,7 |
| CA-248649 | FR23      | -83,1  | -98,5 | -77,3 |
| CA-248649 | M016      | -101,0 | -95,2 | -90,1 |
| CA-248649 | RAM2-P V2 | -100,1 | -92,1 | -90,8 |
| CA-248649 | SAM-6     | -99,7  | -95,5 | -92,0 |
| CA-249271 | APM9      | 24,9   | -91,2 | -40,5 |
| CA-249271 | DEF-15    | 44,1   | -95,3 | -9,4  |
| CA-249271 | DEF-15S   | 26,5   | -98,6 | -24,1 |
| CA-249271 | DNPM      | 25,1   | -96,5 | -80,2 |
| CA-249271 | FPY-12    | -98,8  | -89,7 | -85,6 |
| CA-249271 | FPY-2     | -68,4  | -93,7 | -91,1 |
| CA-249271 | FR23      | 33,4   | -94,9 | -33,8 |
| CA-249271 | M016      | -100,2 | -94,1 | -90,9 |
| CA-249271 | RAM2-P V2 | -84,4  | -95,4 | -92,4 |

|           |           |        |       |       |
|-----------|-----------|--------|-------|-------|
| CA-249271 | SAM-6     | -82,5  | -95,8 | -89,4 |
| CA-249379 | APM9      | -80,5  | -93,2 | -90,4 |
| CA-249379 | DEF-15    | 42,9   | -75,0 | -3,1  |
| CA-249379 | DEF-15S   | 15,9   | -99,0 | -49,8 |
| CA-249379 | DNPM      | -99,7  | -98,1 | -93,1 |
| CA-249379 | FPY-12    | -59,8  | -89,8 | -76,1 |
| CA-249379 | FPY-2     | 13,9   | -92,8 | -90,8 |
| CA-249379 | FR23      | -32,3  | -94,3 | -90,4 |
| CA-249379 | M016      | -99,6  | -98,1 | -94,5 |
| CA-249379 | RAM2-P V2 | -97,9  | -94,3 | -88,5 |
| CA-249379 | SAM-6     | -85,6  | -84,8 | -90,6 |
| CA-251294 | APM9      | -76,9  | -93,6 | -90,5 |
| CA-251294 | DEF-15    | 23,3   | -93,6 | -22,1 |
| CA-251294 | DEF-15S   | 2,3    | -96,9 | -28,6 |
| CA-251294 | DNPM      | -79,1  | -97,8 | -93,5 |
| CA-251294 | FPY-12    | -99,9  | -87,5 | -87,0 |
| CA-251294 | FPY-2     | -149,5 | -94,4 | -90,9 |
| CA-251294 | FR23      | -53,5  | -97,8 | -91,3 |
| CA-251294 | M016      | -89,9  | -95,2 | -91,8 |
| CA-251294 | RAM2-P V2 | -98,4  | -96,1 | -90,6 |
| CA-251294 | SAM-6     | -99,1  | -95,1 | -91,6 |
| CA-253038 | APM9      | -89,1  | -93,8 | -90,3 |
| CA-253038 | DEF-15    | 27,1   | -98,0 | -30,9 |
| CA-253038 | DEF-15S   | 7,6    | -70,9 | -5,1  |
| CA-253038 | DNPM      | -38,0  | -99,0 | -76,6 |
| CA-253038 | FPY-12    | -95,9  | -90,0 | -86,6 |
| CA-253038 | FPY-2     | 1,7    | -94,9 | -87,0 |
| CA-253038 | FR23      | -118,0 | -34,4 | -29,4 |
| CA-253038 | M016      | -72,1  | -27,7 | -31,4 |
| CA-253038 | RAM2-P V2 | -94,7  | -99,0 | -94,9 |
| CA-253038 | SAM-6     | -100,2 | -89,0 | -89,7 |
| CA-259211 | APM9      | -41,6  | -91,9 | -88,8 |
| CA-259211 | DEF-15    | 41,2   | -93,7 | -14,2 |
| CA-259211 | DEF-15S   | 42,3   | -97,3 | -35,1 |
| CA-259211 | DNPM      | -101,3 | -96,1 | -4,5  |
| CA-259211 | FPY-12    | 36,9   | -87,2 | -55,4 |
| CA-259211 | FPY-2     | -100,8 | -92,0 | -87,7 |
| CA-259211 | FR23      | -84,7  | -98,5 | -96,2 |
| CA-259211 | M016      | -98,8  | -97,5 | -94,4 |
| CA-259211 | RAM2-P V2 | -100,8 | -94,5 | -90,7 |
| CA-259211 | SAM-6     | -109,0 | -94,9 | -92,6 |
